# Supplementary material
Source: Elsevier journal article supplement (https://repository.uel.ac.uk/download/b92e7a0400ae8ff68fb844552f0efa7798c15fbefc6c99a9b2376f92297bf913/24064/mmc1.doc)
Supplement: mmc1 [file mmc1.doc]

# Supplementary Material

## Questionnaire items (Spanish version)

Q1. “*Durante el experimento hubo momentos en los que sentía como si la mano de goma izquierda fuera mi propia mano izquierda”.*

Q2. “*Durante el experimento hubo momentos en los que sentía como si la mano de goma derecha fuera mi propia mano derecha*”.

Q3. “*Respecto a la mano izquierda hubo momentos en los que tuve la sensación de estar recibiendo los golpecitos en el lugar en el que se encontraba la mano de goma izquierda*”.

Q4. “*Respecto a la mano derecha hubo momentos en los que tuve la sensación de estar recibiendo los golpecitos en el lugar en el que se encontraba la mano de goma derecha*”.
